# Supplementary material for: Effect of exercise interventions on hospital length of stay and admissions during cancer treatment: a systematic review and meta-analysis
Source: HighWire-hosted journal article supplement (doi:10.1136/bjsports-2023-107372), 2023-11-21
Supplement: bjsports-2023-107372supp001_data_supplement.pdf [file bjsports-2023-107372supp001_data_supplement.pdf]

**Sensitivity Analysis 1a:** Days of hospitalization with three active controls removed i.e., Baumann-2011, Sana Mina-2020 and Wiskermann-2011.

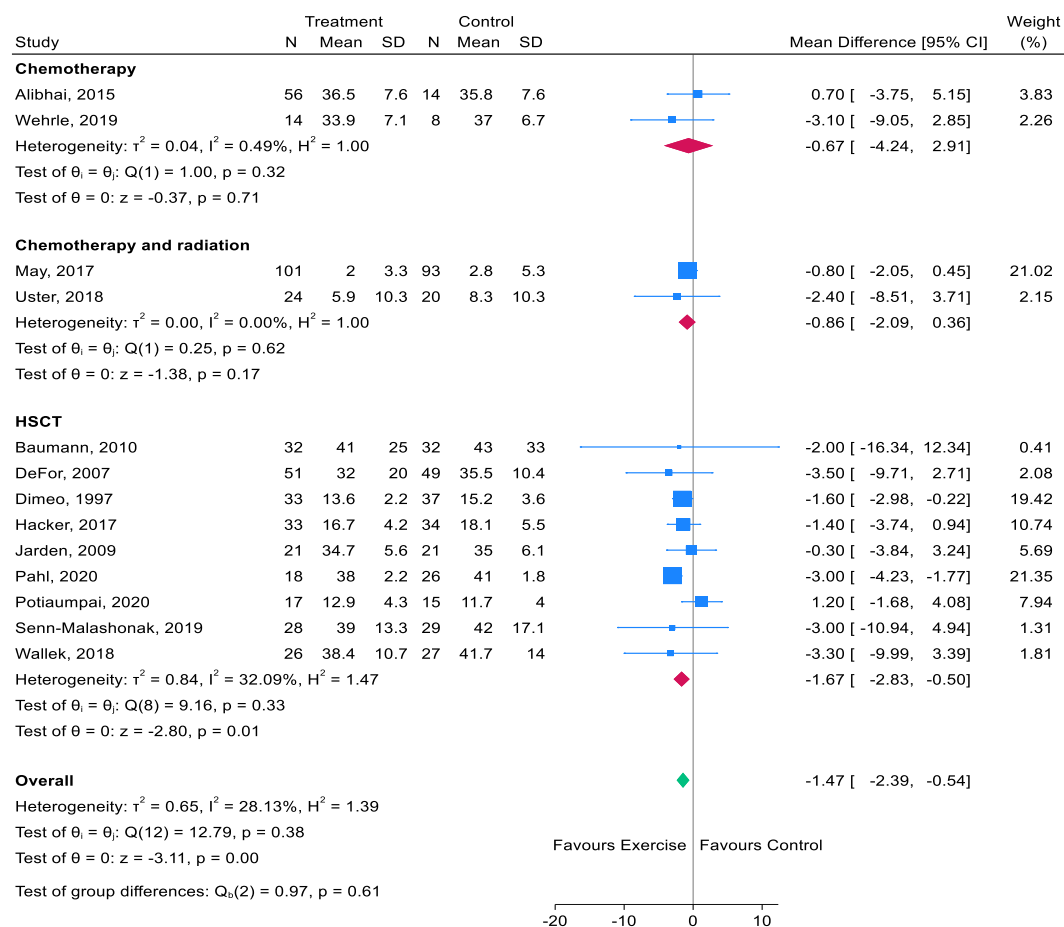

Random-effects REML model

```

.meta regress i.Treatment, random(reml)

Effect-size label: Mean diff.
Effect size: _meta_es
Std. err.: _meta_se

Random-effects meta-regression
Method: REML
Number of obs = 13
Residual heterogeneity:
    tau2 = .7431
    I2 (%) = 26.40
    H2 = 1.36
R-squared (%) = 0.00
Wald chi2(2) = 0.54
Prob > chi2 = 0.7626

```

| _meta_es  | Coefficient | Std. err. | z     | P> z  | [95% conf. interval] |
|-----------|-------------|-----------|-------|-------|----------------------|
| Treatment |             |           |       |       |                      |
| 2         | -.2446497   | 2.177892  | -0.11 | 0.911 | -4.513239 4.023939   |
| 3         | -.9697286   | 2.009679  | -0.48 | 0.629 | -4.908627 2.96917    |
| _cons     | -.7140972   | 1.924735  | -0.37 | 0.711 | -4.486508 3.058314   |

Test of residual homogeneity:  $Q_{res} = \text{chi2}(10) = 10.42$  Prob >  $Q_{res} = 0.4045$

**Comment:**

No substantial changes were detected, with the overall effect for the HSCT subgroup reducing from -1.55 (-2.61 to -0.50) to -1.67 (-2.83 to -0.50), and for all studies, from -1.40 (-2.26 to -0.54) to -1.47 (-2.39 to -0.54). The overall effects for the subgroups Chemotherapy and Chemotherapy & radiation were unchanged. A meta-regression showed no significant association between Treatment and the effect size of Mean Difference ( $p=0.76$ )

**Sensitivity Analysis 1b:** Proportion of hospital admittance with three active controls removed i.e., Baumann-2011, Sana Mina-2020 and Wiskermann-2011.

Comment:

No sensitivity analysis undertaken as the three studies removed were not included in the meta-analysis for Difference in Proportions.

**Sensitivity Analysis 2a:** Days of hospitalization with a subgroup analysis for Supervision (Supervised, Partially Supervised, Unsupervised).

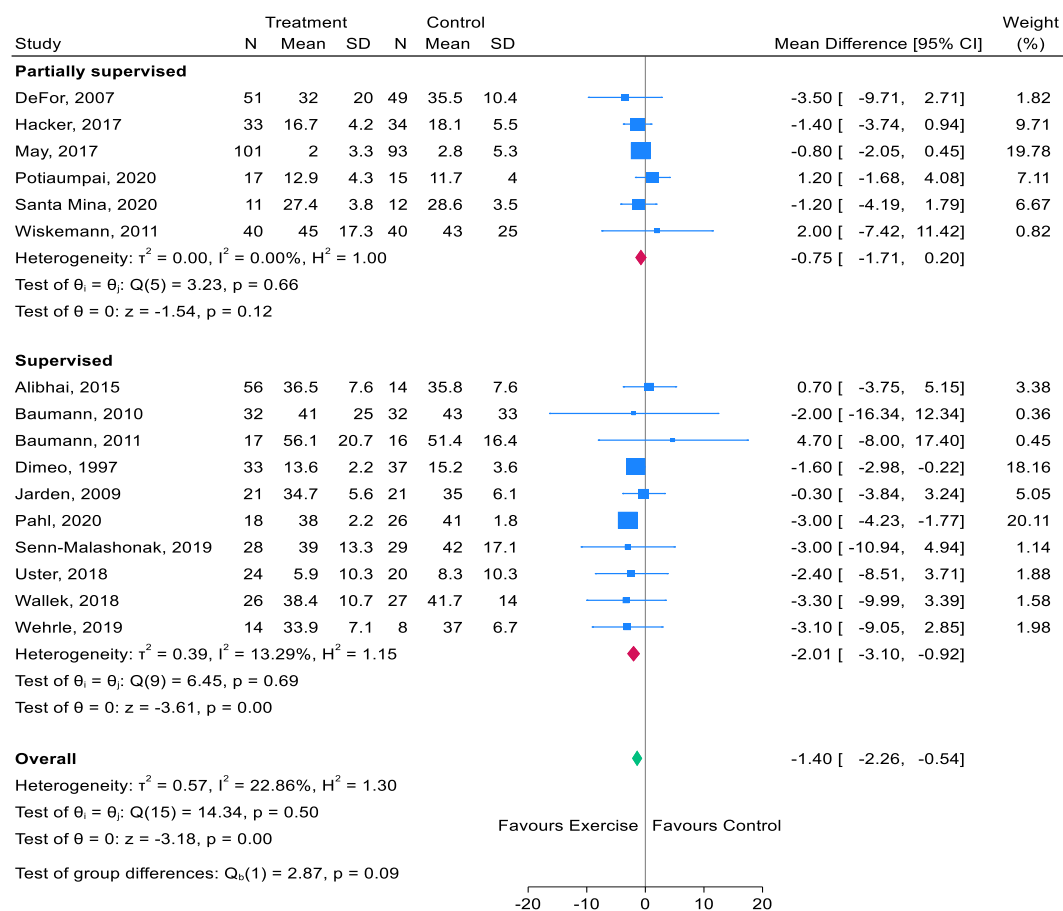

Random-effects REML model

```
. xi: meta regress i.Supervision, random(reml)
i.Supervision      _ISupervisi_1-2      (_ISupervisi_1 for Sup-n==Partially supervised omitted)

Effect-size label: Mean diff.
Effect size:      _meta_es
Std. err.:       _meta_se
```

```
Random-effects meta-regression      Number of obs =      16
Method: REML                        Residual heterogeneity:
                                     tau2 =      .1347
                                     I2 (%) =      5.49
                                     H2 =      1.06
                                     R-squared (%) = 76.32
                                     Wald chi2(1) =      3.51
                                     Prob > chi2 =      0.0610
```

| _meta_es      | Coefficient | Std. err. | z     | P> z  | [95% conf. interval] |
|---------------|-------------|-----------|-------|-------|----------------------|
| _ISupervisi_2 | -1.34898    | .7201094  | -1.87 | 0.061 | -2.760369 .0624081   |
| _cons         | -.7473577   | .537539   | -1.39 | 0.164 | -1.800915 .3061993   |

Test of residual homogeneity:  $Q_{res} = \chi^2(14) = 9.68$  Prob >  $Q_{res} = 0.7851$

**Comment:**

The overall mean-difference for Supervised Treatment was 1.26 days less than the overall mean-difference for Partially Supervised Treatment. A meta-regression showed no significant association between Type of Supervision and the effect size of Mean Difference ( $p=0.06$ )

**Sensitivity Analysis 2b:** Proportion of hospital admittance with a subgroup analysis for Supervision (Supervised, Partially Supervised, Unsupervised).

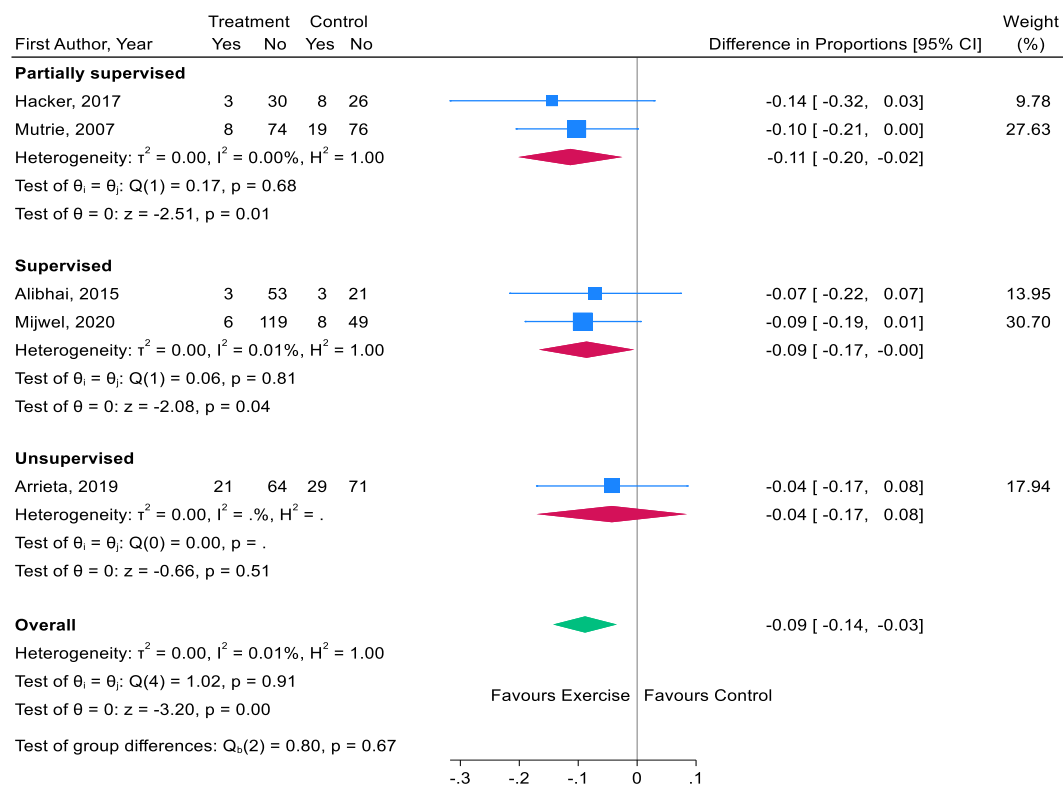

Random-effects REML model

```
. xi: meta regress i.Supervision, random(reml)
i.Supervision _ISupervisi_1-3 (_ISupervisi_1 for Sup-n=Partially supervised omitted)

Effect-size label: Risk diff.
Effect size: _meta_es
Std. err.: _meta_se

Random-effects meta-regression
Method: REML

Number of obs = 5
Residual heterogeneity:
tau2 = 1.3e-08
I2 (%) = 0.00
H2 = 1.00
R-squared (%) = 97.51
Wald chi2(2) = 0.00
Prob > chi2 = 0.6713

_ meta_es | Coefficient Std. err. z P>|z| [95% conf. interval]
-----+-----+-----+-----+-----
_ISupervisi_2 | .0275857 .0611882 0.45 0.652 [-.0923409 .1475124]
_ISupervisi_3 | .0704586 .0792764 0.89 0.374 [-.0849204 .2258375]
_cons | -.1133997 .045136 -2.51 0.012 [-.2018647 -.0249348]

Test of residual homogeneity: Q_res = chi2(2) = 0.22 Prob > Q_res = 0.8950
```

**Comment:**

Whilst the overall effect size for Partially Supervised Exercise was found to be significant, Unsupervised Exercise wasn't and Supervised Exercise was borderline significant. A meta-regression showed no significant association between Type of Supervision and the effect size of Mean Difference (p=0.67)

**Sensitivity Analysis 3a:** Days of hospitalization with a subgroup analysis for Exercise Type (Aerobic, Mixed, Resistance, Vibration).

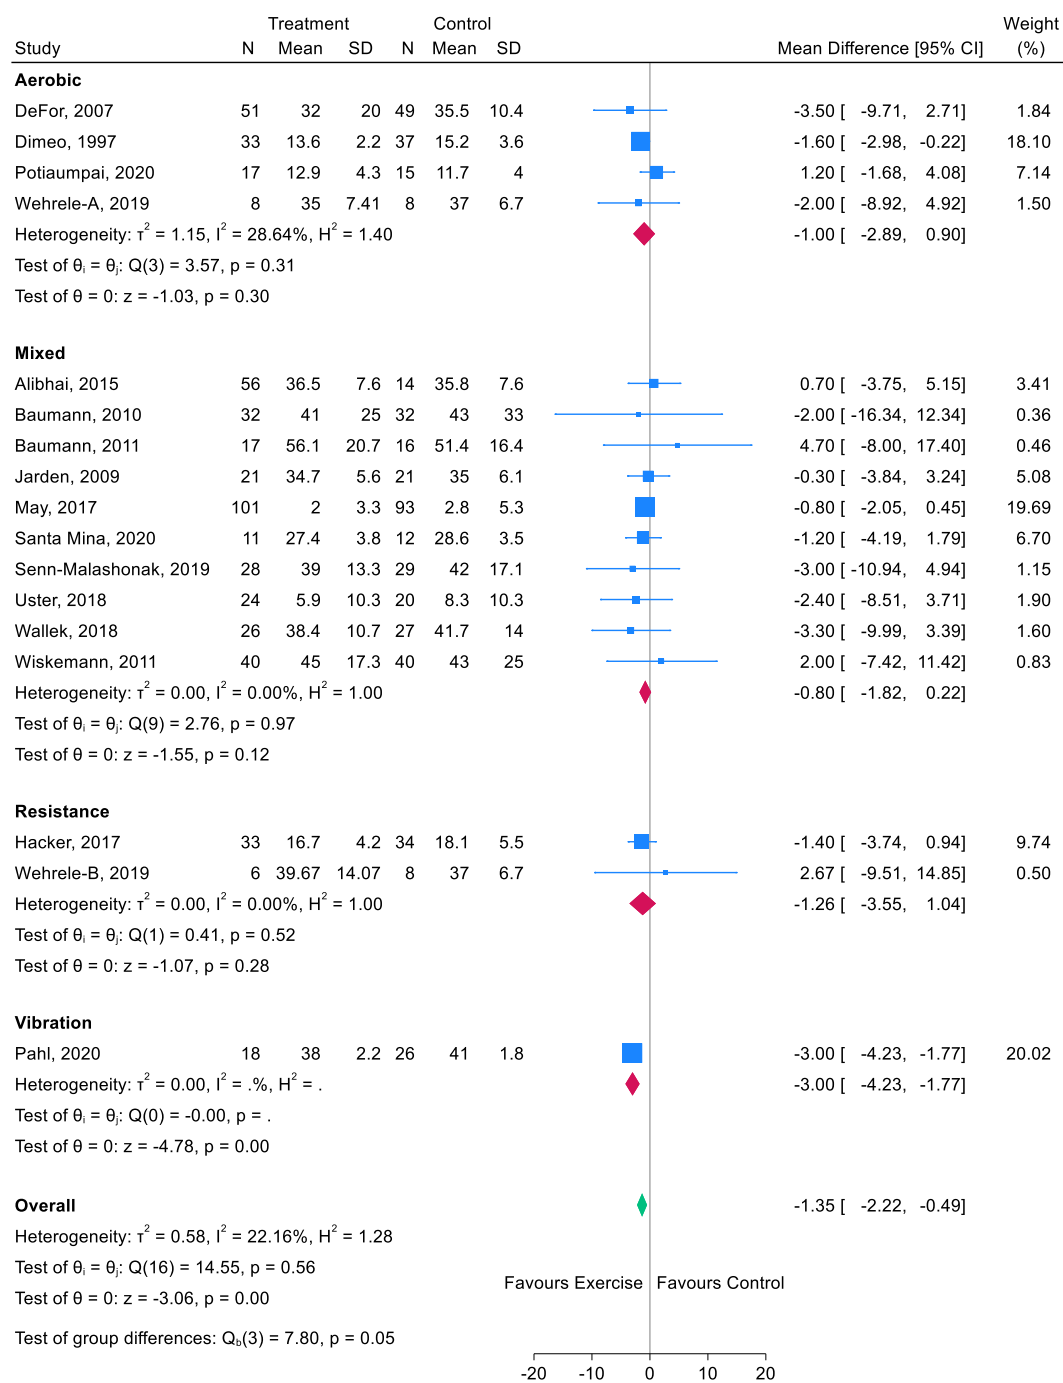

Random-effects REML model

Favours Exercise Favours Control

-20 -10 0 10 20

### Sensitivity Analysis 3a (Continued): Days of hospitalization with a subgroup analysis for Exercise Type (Aerobic, Mixed, Resistance, Vibration).

```
. xi: meta regress i.Exercise, random(reml)
i.Exercise      _IExercise_1-4      (_IExercise_1 for Exe-e==Aerobic omitted)

Effect-size label: Mean diff.
Effect size:  _meta_es
Std. err.:  _meta_se

Random-effects meta-regression      Number of obs =      17
Method: REML                        Residual heterogeneity:
                                     tau2 = 4.0e-08
                                     I2 (%) =  0.00
                                     H2 =  1.00
                                     R-squared (%) = 100.00
                                     Wald chi2(3) =  7.80
                                     Prob > chi2 =  0.0502
```

| _meta_es     | Coefficient | Std. err. | z     | P> z  | [95% conf. interval] |
|--------------|-------------|-----------|-------|-------|----------------------|
| _IExercise_2 | .3918145    | .8040359  | 0.49  | 0.627 | -1.184867 1.966896   |
| _IExercise_3 | -.0612657   | 1.322898  | -0.05 | 0.963 | -2.654098 2.531566   |
| _IExercise_4 | -1.806076   | .8774884  | -2.06 | 0.040 | -3.525922 -.0862306  |
| _cons        | -1.193924   | .613581   | -1.95 | 0.052 | -2.39652 .0086729    |

Test of residual homogeneity: Q\_res = chi2(13) = 6.75 Prob > Q\_res = 0.9146

#### Comment:

The subgroup analysis as shown by the forest plot indicates no substantial difference between the three types of exercise. This was supported by meta-regression which showed no significant association between Type of Exercise and the effect size of Mean Difference ( $p=0.0502$ )

**Sensitivity Analysis 3b:** Proportion of hospital admittance with a subgroup analysis for Exercise Type (Aerobic, Mixed, Resistance, Vibration).

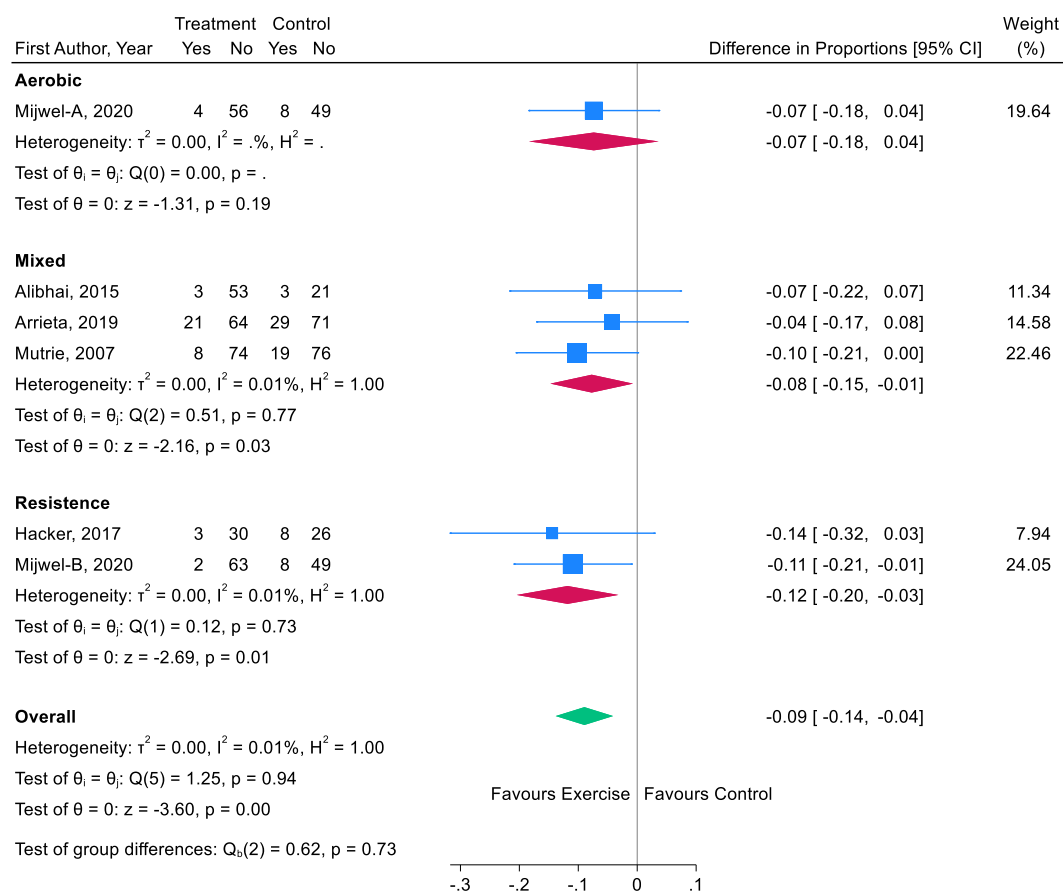

Random-effects REML model

```
. xi: meta regress i.Exercise, random(reml)
i.Exercise      _IExercise_1-3      (_IExercise_1 for Exe=e=Aerobic omitted)

Effect-size label: Risk diff.
Effect size:  _meta_es
Std. err.:  _meta_se

Random-effects meta-regression
Method: REML

Number of obs = 6
Residual heterogeneity:
    tau2 = 3.6e-07
    I2 (%) = 0.01
    H2 = 1.00
R-squared (%) = 0.00
Wald chi2(2) = 0.62
Prob > chi2 = 0.7324
```

| _meta_es     | Coefficient | Std. err. | z     | P> z  | [95% conf. interval] |
|--------------|-------------|-----------|-------|-------|----------------------|
| _IExercise_2 | -.0035528   | .0665921  | -0.05 | 0.957 | -.1340708 .1269653   |
| _IExercise_3 | -.0445402   | .0713464  | -0.62 | 0.532 | -.1843767 .0952962   |
| _cons        | -.0736842   | .0561615  | -1.31 | 0.190 | -.1837586 .0363902   |

Test of residual homogeneity:  $Q_{res} = \text{chi2}(3) = 0.63$  Prob >  $Q_{res} = 0.8895$

**Comment:**

The subgroup analysis as shown by the forest plot indicates no substantial difference between the three types of exercise. This was (just) supported by meta-regression which showed no significant association between Type of Exercise and the effect size of Difference in Proportions ( $p=0.73$ )

**Sensitivity Analysis 4:** Days of hospitalization with a subgroup analysis for Adult (Yes=Adult, No=Child).

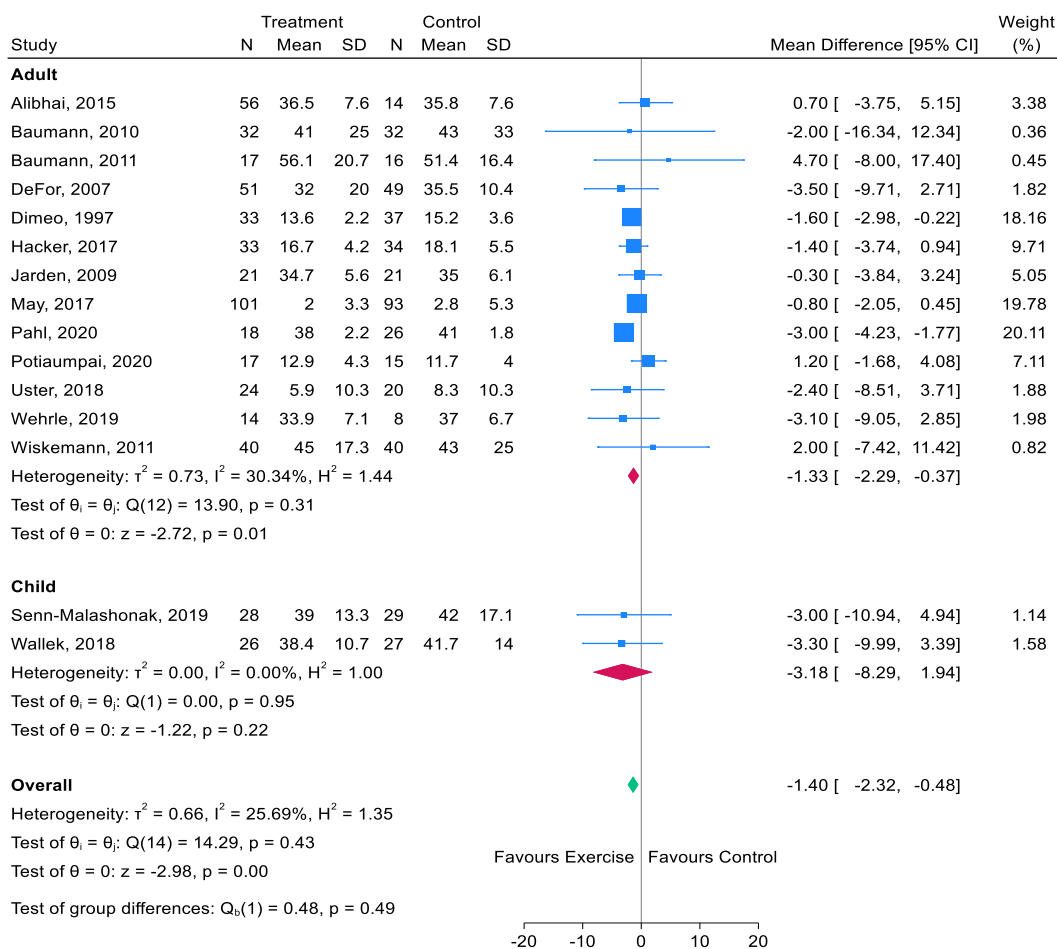

Random-effects REML model

```
. xi: meta regress i.Adult, random(reml)
i.Adult      _IAdult_1-2      (_IAdult_1 for Adult==Adult omitted)

Effect-size label: Mean diff.
Effect size:      _meta_es
Std. err.:       _meta_se

Random-effects meta-regression
Method: REML

Number of obs = 15
Residual heterogeneity:
tau2 = .7071
I2 (%) = 28.18
H2 = 1.39
R-squared (%) = 0.00
Wald chi2(1) = 0.46
Prob > chi2 = 0.4996
```

| _meta_es  | Coefficient | Std. err. | z     | P> z  | [95% conf. interval] |
|-----------|-------------|-----------|-------|-------|----------------------|
| _IAdult_2 | -1.838374   | 2.722938  | -0.68 | 0.500 | -7.175235 3.498487   |
| _cons     | -1.335735   | .4851467  | -2.75 | 0.006 | -2.286605 -.384865   |

Test of residual homogeneity:  $Q_{res} = chi2(13) = 13.90$  Prob >  $Q_{res} = 0.3888$

**Comment:**

The subgroup analysis showed some variation been the overall effect size for studies involving adults (Mean Difference=-1.33 (-2.29 to -0.37)) compared to studies involving children (Mean Difference=-3.18 (-8.29 to 1.94)). However, a meta-regression showed no significant association between Adult (Yes, No) and the effect size of Mean Difference ( $p=0.50$ ).



**Sensitivity Analysis 5a: Days of hospitalization with a subgroup analysis for Duration (< 4 days, ≥ 5 days)**

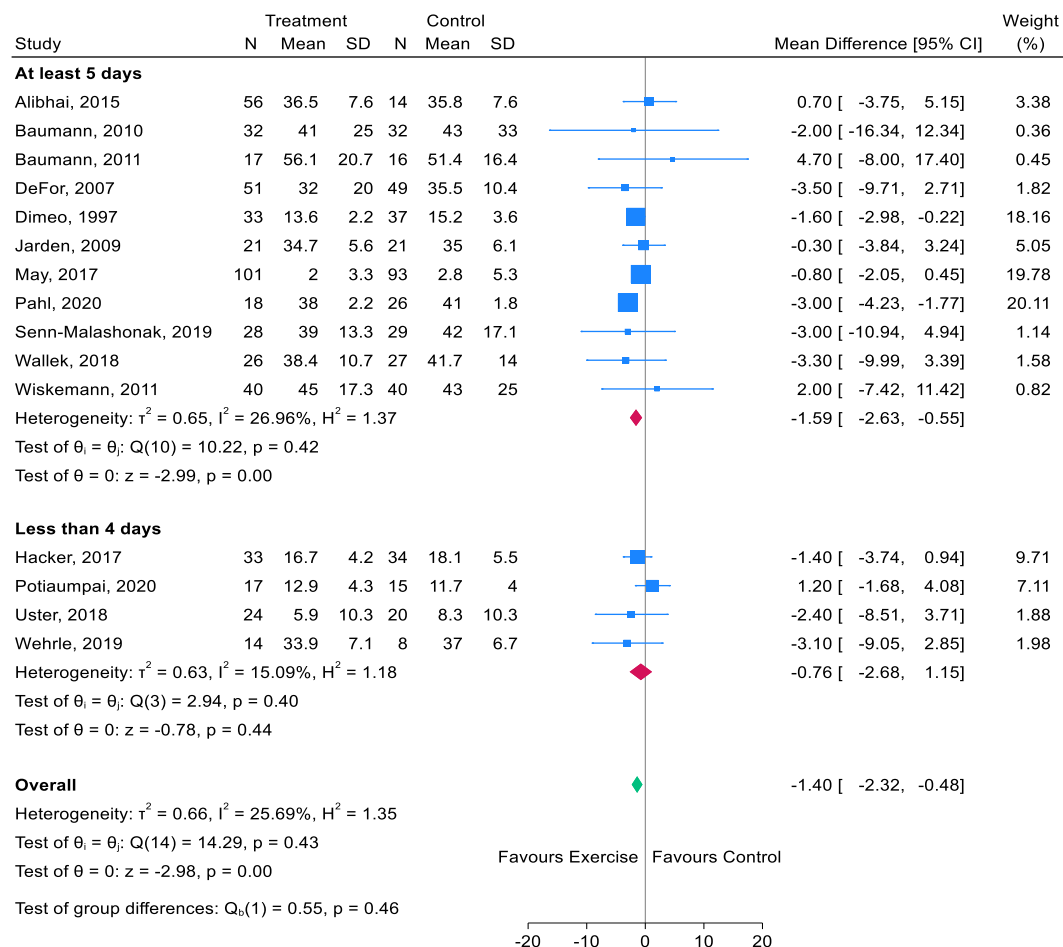

Random-effects REML model

```

.xi: meta regress i.Duration, random(reml)
i.Duration      _IDuration_1-2      (_IDuration_1 for Dur~n==At least 5 days omitted)

Effect-size label: Mean diff.
Effect size:      _meta_es
Std. err.:       _meta_se

Random-effects meta-regression      Number of obs =      15
Method: REML                        Residual heterogeneity:
                                     tau2 =      .6457
                                     I2 (%) =     24.55
                                     H2 =      1.33
                                     R-squared (%) =  2.38
                                     Wald chi2(1) =    0.55
                                     Prob > chi2 =    0.4594

   _meta_es | Coefficient Std. err.   z   P>|z|   [95% conf. interval]
-----+-----+-----+-----+-----+-----
   _IDuration_2 | .8259886   1.116498   0.74   0.459   -1.362307   3.014284
   _cons        | -1.590524   .5322349  -2.99   0.003   -2.633685   -.547363

Test of residual homogeneity: Q_res = chi2(13) = 13.16   Prob > Q_res = 0.4354
    
```

**Comment:**

A subgroup analysis as displayed by the forest plot indicated no substantial variation between subgroups. A meta-regression showed no significant association between Duration and the effect size of Mean Difference ( $p=0.49$ )

**Sensitivity Analysis 5b:** Proportion of hospitalization with a subgroup analysis for Duration (< 4 days, ≥ 5 days)

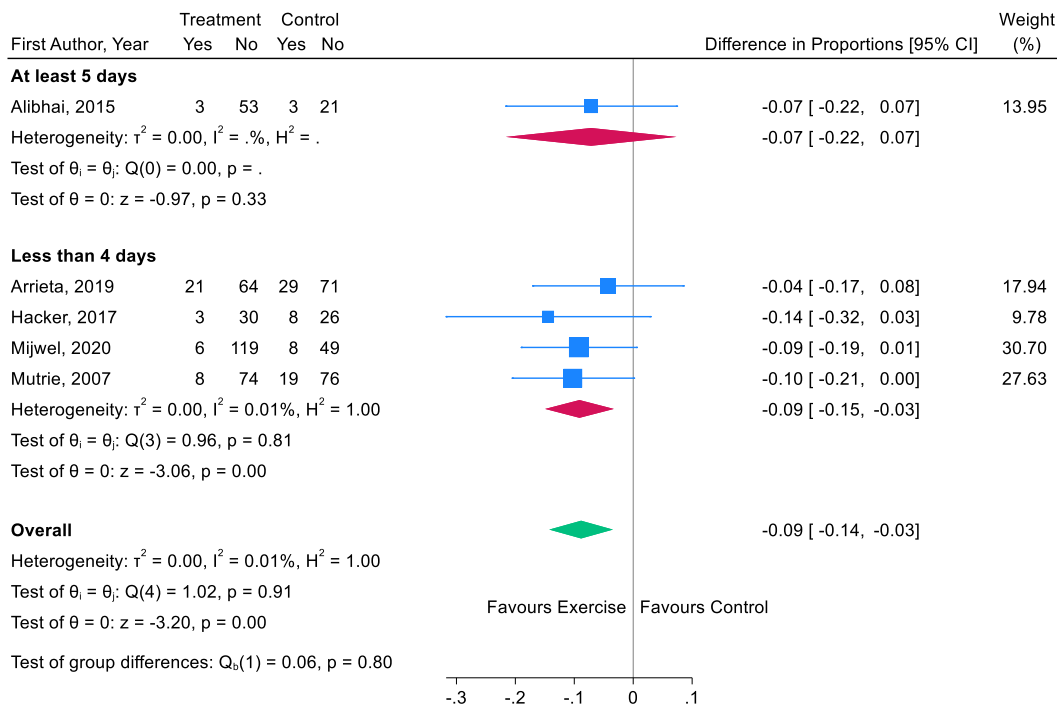

Random-effects REML model

```
. xi: meta regress i.Duration, random(reml)
i.Duration      _IDuration_1-2      (_IDuration_1 for Dur~n=At least 5 days omitted)

Effect-size label: Risk diff.
Effect size:      _meta_es
Std. err.:       _meta_se

Random-effects meta-regression
Method: REML

Number of obs =      5
Residual heterogeneity:
    tau2 = 2.2e-07
    I2 (%) = 0.01
    H2 = 1.00
R-squared (%) = 57.02
Wald chi2(1) = 0.06
Prob > chi2 = 0.8040

+-----+-----+-----+-----+-----+
|_meta_es| Coefficient | Std. err. | z | P>|z| | [95% conf. interval] |
+-----+-----+-----+-----+-----+
|_IDuration_2| -.0197704 | .079678 | -0.25 | 0.804 | -.1759364 .1363957 |
|_cons| -.0714286 | .0739114 | -0.97 | 0.334 | -.2162923 .0734352 |
+-----+-----+-----+-----+-----+
Test of residual homogeneity: Q_res = chi2(3) = 0.96 Prob > Q_res = 0.8115
```

**Comment:**

A subgroup analysis as displayed by the forest plot indicated no substantial variation between subgroups concerning point estimates, however, there was substantial greater precision for the subgroup of Less than 4 Days compared to the subgroup of At Least 5 days A meta-regression showed no significant association between Duration and the effect size of Duration ( $p=0.80$ ).
